# Supplementary material
Source: MDPI journal article supplement (https://www.mdpi.com/2071-1050/13/4/1779)
Supplement: s1 [file s1]

Supplementary Information

# The Sewage Sludge Biochar and Its Composts Influence the Phosphate Sorption in an Alkaline–Calcareous Soil

**Rabia Abdur Rehman**<sup>1</sup>, **Muhammad Farooq Qayyum**<sup>1,\*</sup>, **Ghulam Haider**<sup>2</sup>, **Kate Schofield**<sup>3</sup>, **Muhammad Abid**<sup>1</sup>, **Muhammad Rizwan**<sup>4</sup> and **Shafaqat Ali**<sup>4,5,\*</sup>

<sup>1</sup> Department of Soil Science, Faculty of Agricultural Sciences & Technology, Bahauddin Zakariya University, Multan 60800, Pakistan; rabimalik075@gmail.com (R.A.R.); muhammadabid@bzu.edu.pk (M.A.)

<sup>2</sup> Department of Plant Biotechnology, Atta-ur-Rahman School Applied Biosciences, National University of Sciences and Technology (NUST), Islamabad 44000, Pakistan; ghulam.haider@asab.nust.edu.pk

<sup>3</sup> Biogeochemistry Research Centre, B504 Portland Square, University of Plymouth, Drake Circus, Plymouth PL4 8AA, UK; kate.schofield@plymouth.ac.uk

<sup>4</sup> Department of Environmental Sciences and Engineering, Government College University, Faisalabad 38000, Pakistan; mrizi1532@yahoo.com

<sup>5</sup> Department of Biological Sciences and Technology, China Medical University, Taichung 40402, Taiwan

\* Correspondence: farooq.qayyum@bzu.edu.pk (M.F.Q.); shafaqataligill@gcuf.edu.pk (S.A.)



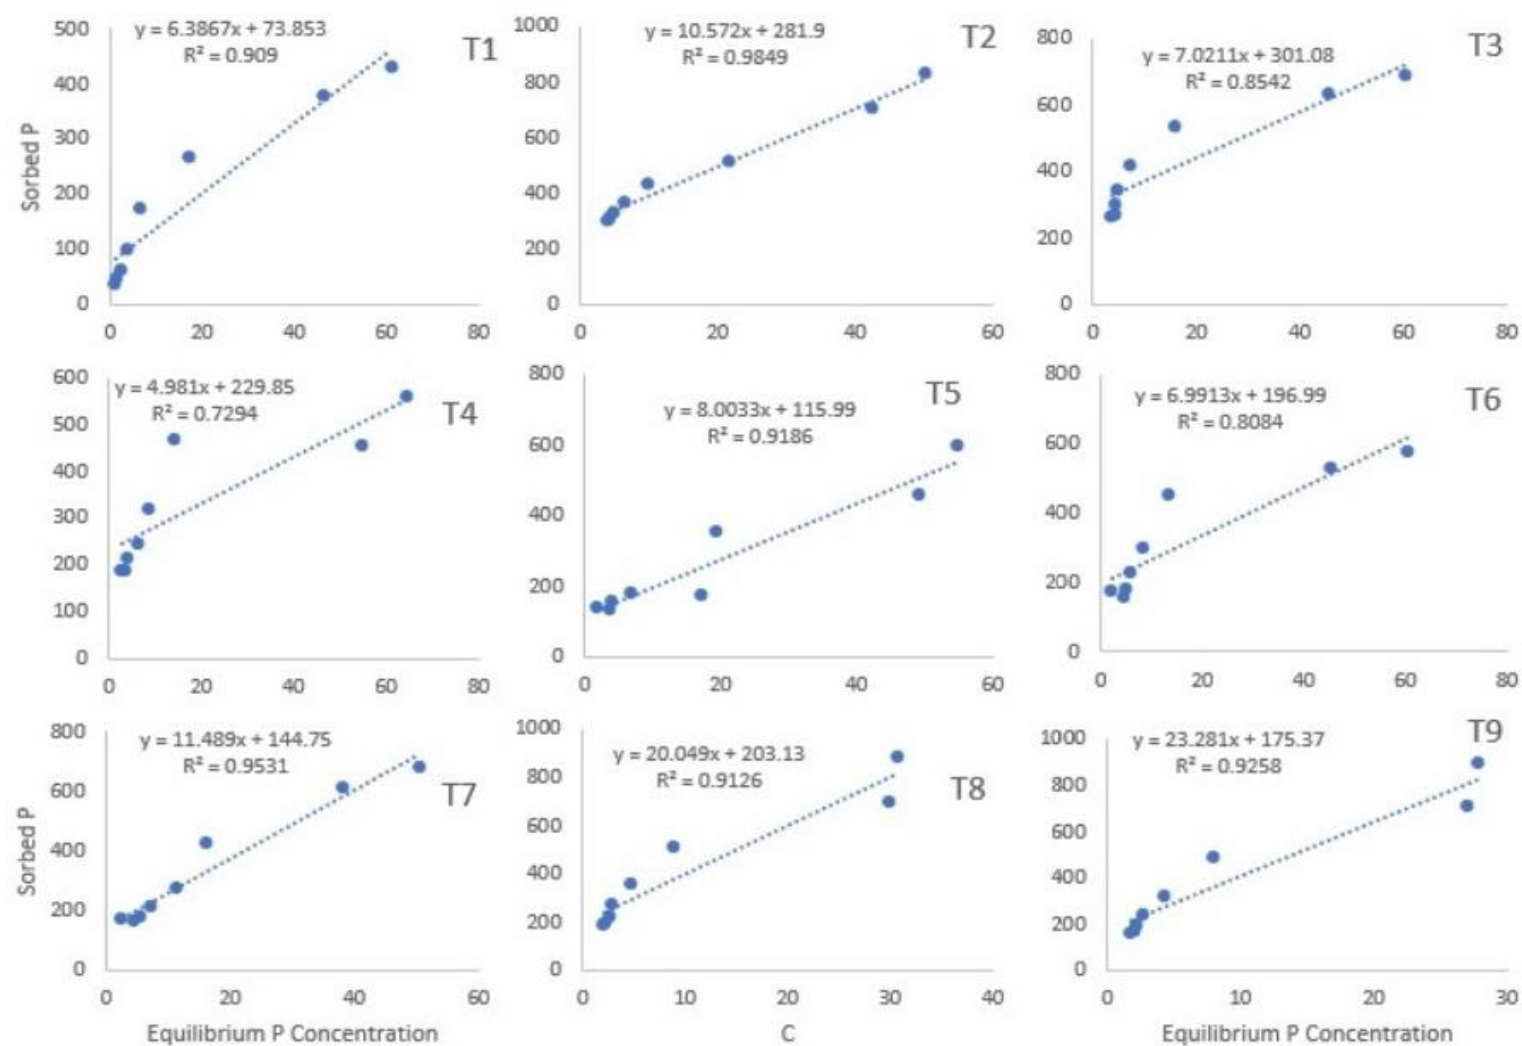

Figure S2. Sorption equation fitted using Langmuir (5 d incubation samples).

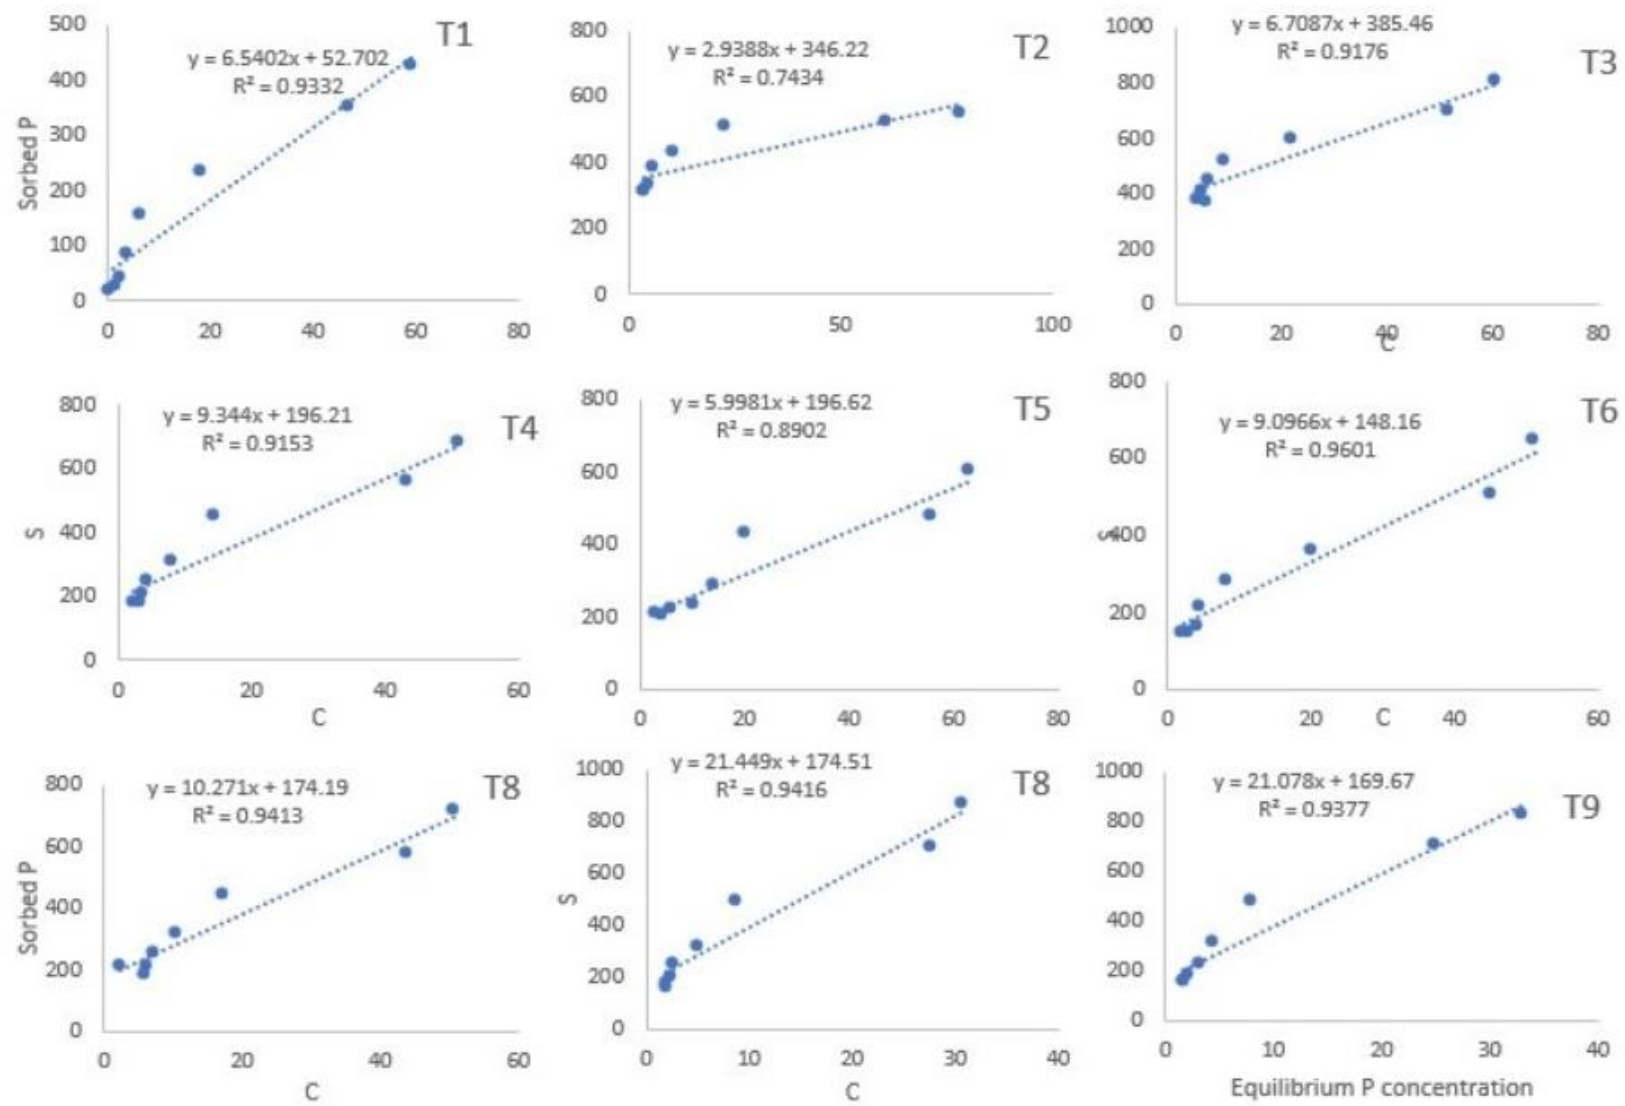

Figure S3. Sorption equation fitted using Langmuir (45 d incubation samples).

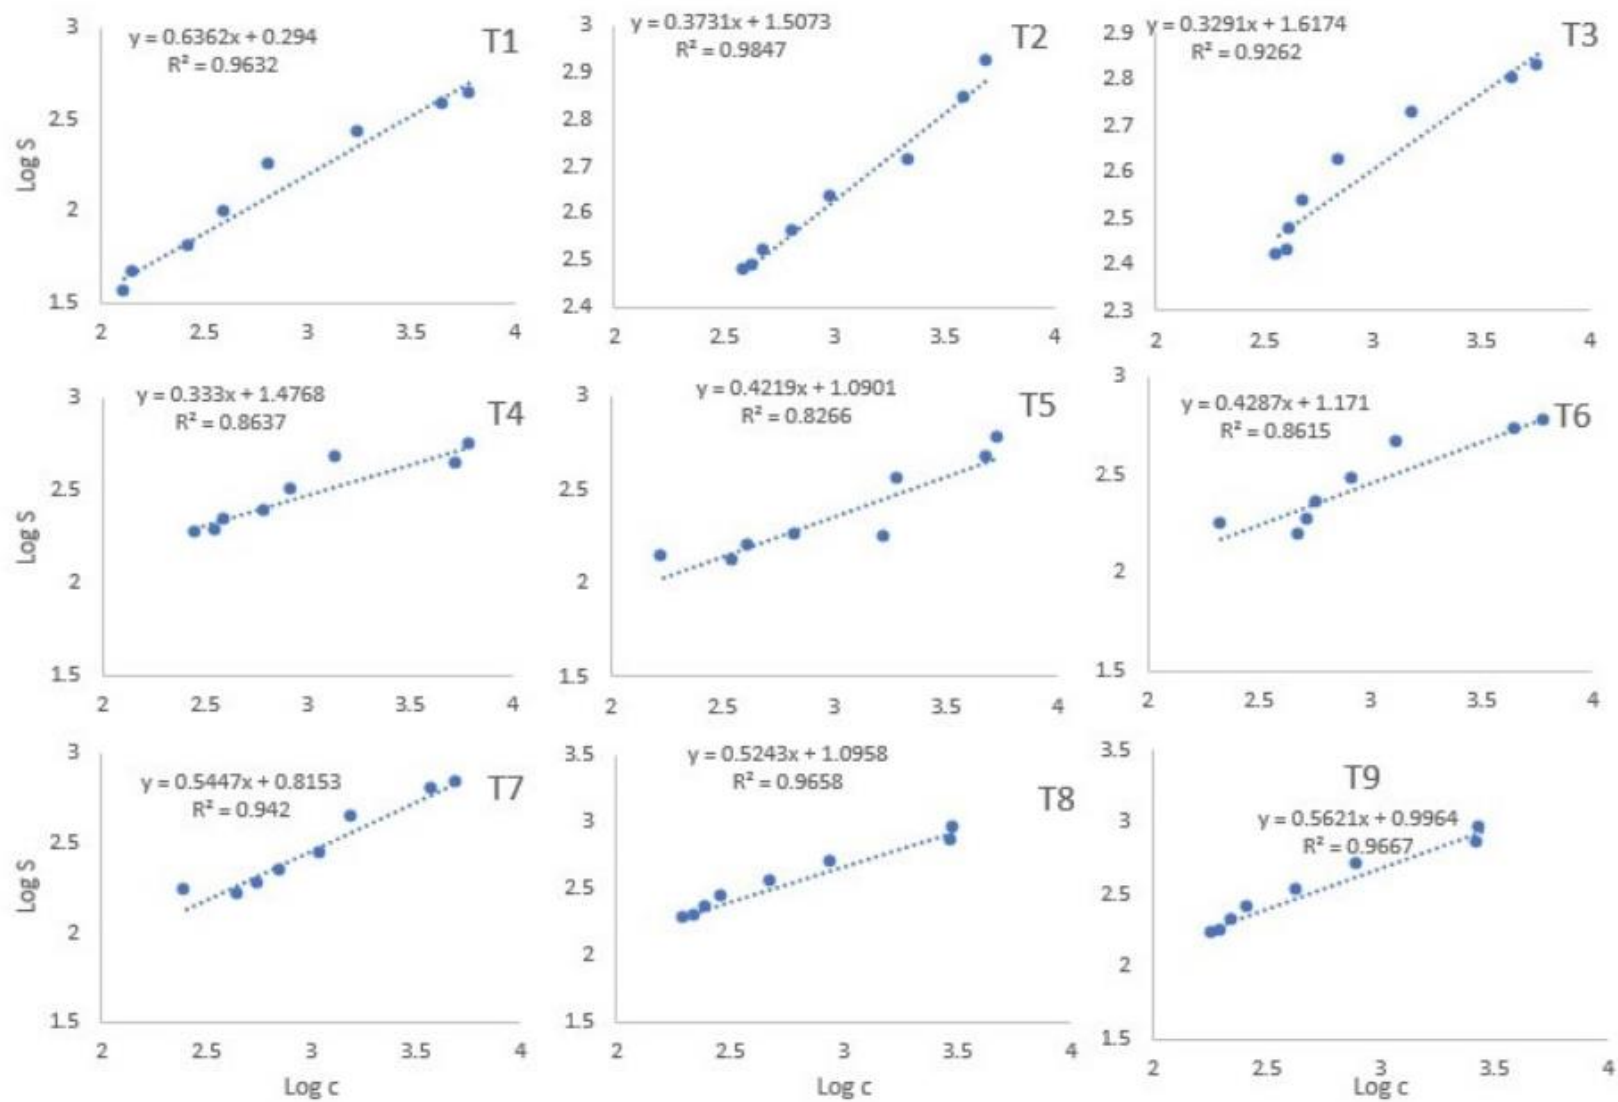

Figure S4. Sorption equation fitted using Freundlich (5 d incubation samples).

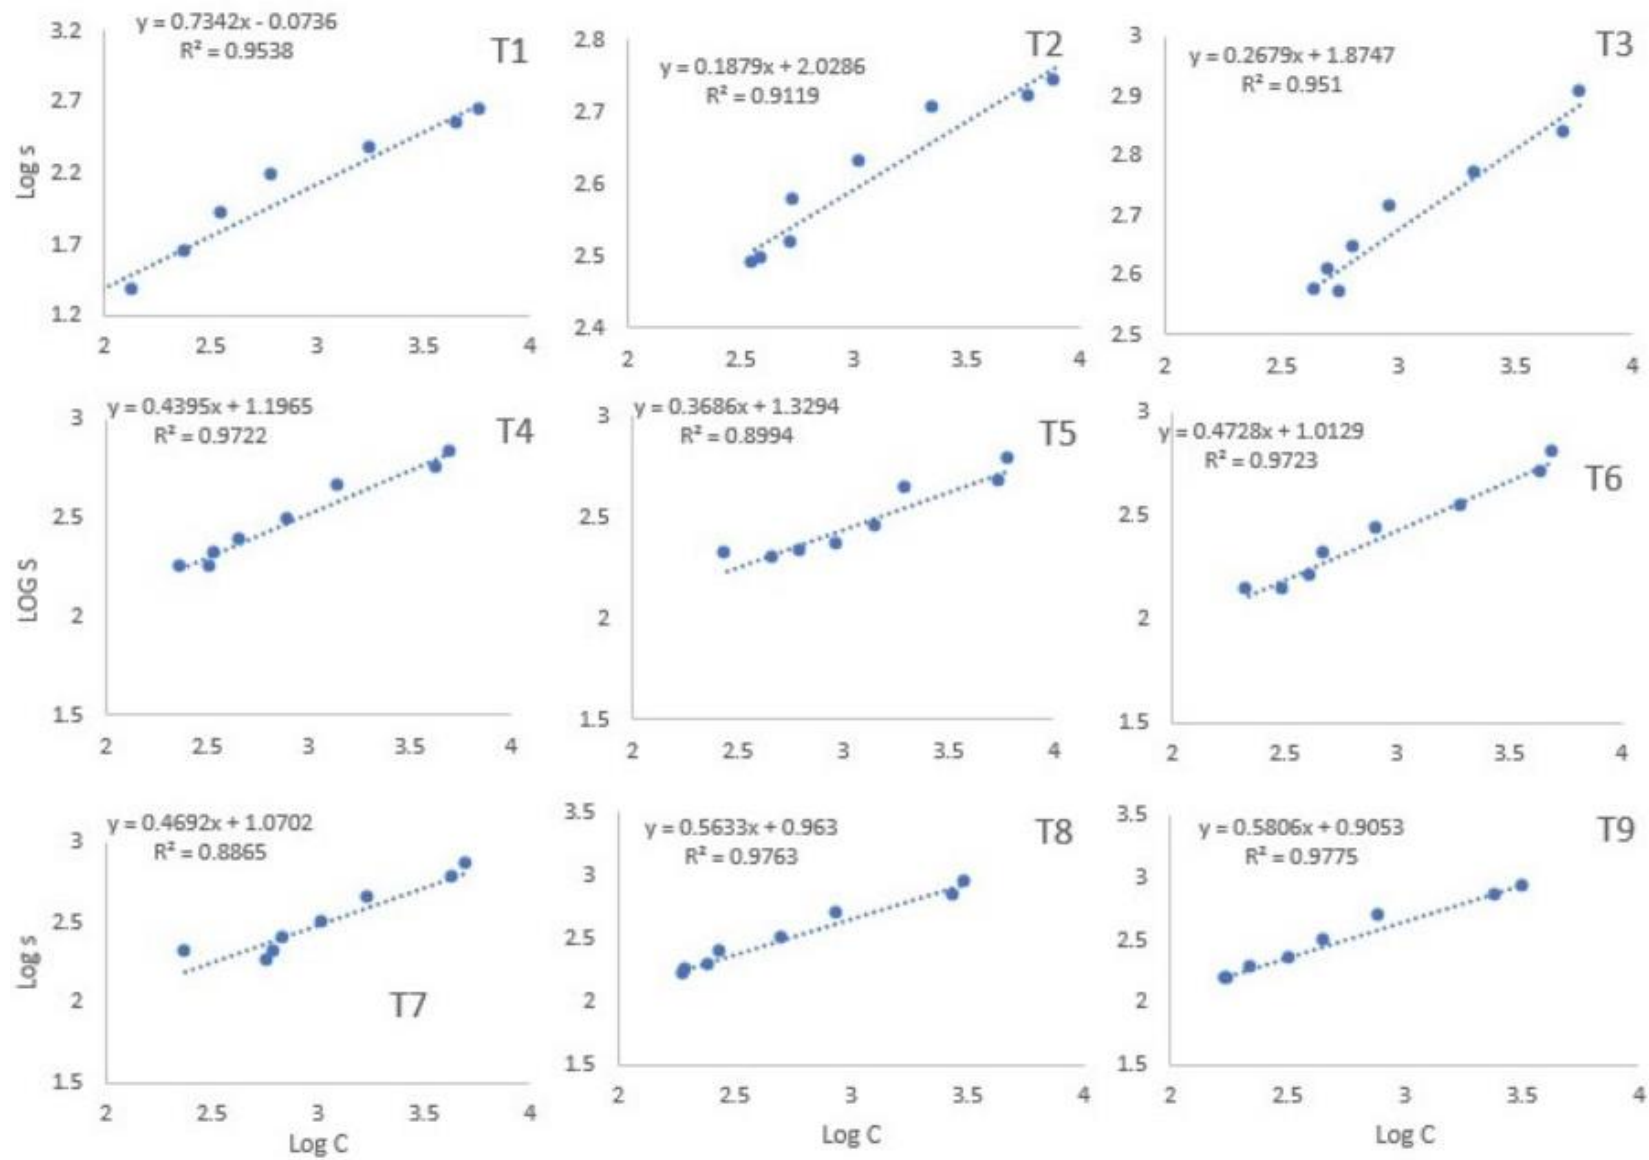

**Figure S5.** Sorption equation fitted using Freundlich (45 d incubation samples).
